# Supplementary material for: Association Between Bone-lead Concentration and Aggression in Youth From a Sub-cohort of the Birth to Twenty Cohort
Source: Research Square preprint supplement (doi:10.21203/rs.3.rs-832446/v1), 2021-08-26
Supplement: Supplementary file 1 [file 1f1fe1f8daed9cf06a02f0dc.docx]

**Table 1: Assessment of the association between physical aggression, bone lead and individual level confounders: Final model**

| Factors | Mean | P value | 95% CI |  |
| --- | --- | --- | --- | --- |
| Pb | 0.1 | 0.352 | -0.099 | 0.274 |
| Age |  |  |  |  |
| =23 years | ref |  |  |  |
| =24 years | -1.4 | 0.218 | -3.763 | 0.867 |
| Sex |  |  |  |  |
| Male | ref |  |  |  |
| Female | -1.0 | 0.305 | -2.922 | 0.924 |
| Exposure to family violence |  |  |  |  |
| Yes | 2.7 | 0.012** | 0.606 | 4.750 |
| No | ref |  |  |  |
| Exposure to crime and violence |  |  |  |  |
| Yes | -1.9 | 0.061* | -3.834 | 0.086 |
| No | ref |  |  |  |

*****P< 0.05 significant *p ≤0.08 marginally significant***

**Table 2: Assessment of the association between verbal aggression, bone lead and individual level confounders: Final model**

| Factors | Mean | P value | 95% CI |  |
| --- | --- | --- | --- | --- |
| Pb | 0.1 | 0.189 | -0.046 | 0.233 |
| Age |  |  |  |  |
| =23 years | ref |  |  |  |
| =24 years | 0.03 | 0.967 | -1.665 | 1.735 |
| Sex |  |  |  |  |
| Male | ref |  |  |  |
| Female | 0.9 | 0.244 | -0.588 | 2.290 |
| Exposure to family violence |  |  |  |  |
| Yes | 1.4 | 0.069* | -0.116 | 2.987 |
| No | ref |  |  |  |
| Attitude toward neighbourhood |  |  |  |  |
| somewhat unsafe/very unsafe | -2.8 | 0.003** | -4.603 | -0.971 |
| Somewhat safe/very safe | ref |  |  |  |

******p<0.001 highly significant; **P< 0.05 significant; *p ≤0.08 marginally significant***

**Table 3: Assessment of the association between hostility, bone lead and individual level confounders: Final model**

| Factors | mean | P value | 95% CI |  |
| --- | --- | --- | --- | --- |
| Pb | 0.03 | 0.792 | -0.196 | 0.256 |
| Age |  |  |  |  |
| =23 years | ref |  |  |  |
| =24 years | -2.9 | 0.037** | -5.675 | -0.183 |
| Sex |  |  |  |  |
| Male | ref |  |  |  |
| Female | 0.6 | 0.638 | -1.772 | 2.878 |
| Exposure to family violence |  |  |  |  |
| Yes | 2.8 | 0.028** | 0.307 | 5.319 |
| No | ref |  |  |  |
| Attitude toward neighbourhood |  |  |  |  |
| somewhat unsafe/very unsafe | -3.7 | 0.014** | -6.646 | -0.778 |
| Somewhat safe/very safe | ref |  |  |  |

*****P< 0.05 significant.***

**Table 4: Assessment of the association between total aggression score, bone lead and individual level confounders: Final model**

| Factors | mean | P value | 95% CI |  |
| --- | --- | --- | --- | --- |
| Pb | 0.4 | 0.108 | -0.942 | 0.934 |
| Age |  |  |  |  |
| =23 years | ref |  |  |  |
| =24 years | -5.3 | 0.103 | -11.709 | 1.086 |
| Sex |  |  |  |  |
| Male | ref |  |  |  |
| Female | 1.3 | 0.624 | -3.999 | 6.627 |
| Exposure to family violence |  |  |  |  |
| Yes | 11.9 | <0.001*** | 6.180 | 17.632 |
| No | ref |  |  |  |
| Attitude toward neighbourhood |  |  |  |  |
| somewhat unsafe/very unsafe | -11.2 | 0.001** | -17.979 | -4.481 |
| Somewhat safe/very safe | ref |  |  |  |

******p<0.001 highly significant; **P< 0.05- significant***
